# Supplementary material for: Poor Muscle Status, Dietary Protein Intake, Exercise Levels, Quality of Life and Physical Function in Women with Metastatic Breast Cancer at Chemotherapy Commencement and during Follow-Up
Source: MDPI journal article supplement (doi:10.3390/curroncol30010054), 2023-01-05
Supplement: s1 [file s1]

**Supplementary Material S3.** EWGSOP2 algorithm for case-finding, making a diagnosis and quantifying severity of sarcopenia.

| Stage             | Muscle Mass <sup>1</sup> | Muscle Mass <sup>2</sup> |            | Physical Function <sup>3</sup> |
|-------------------|--------------------------|--------------------------|------------|--------------------------------|
| Pre-sarcopenia    | Low                      |                          |            |                                |
| Sarcopenia        | Low                      | Low                      | <i>OR</i>  | Low                            |
| Severe Sarcopenia | Low                      | Low                      | <i>AND</i> | Low                            |

<sup>1</sup> L3 skeletal muscle index  $\leq 38.5 \text{ cm}^2/\text{m}^2$  (50).

<sup>2</sup> Handgrip strength  $< 16\text{kg}$  (11).

<sup>3</sup> 4m walk test speed  $\leq 0.8\text{m/s}$  (11).
